# Supplementary material for: Association of Food Deserts and Food Swamps With Obesity-Related Cancer Mortality in the US
Source: PubMed Central journal article supplement (PMC10160992; doi:10.1001/jamaoncol.2023.0634), 2023-05-04
Supplement: jamaoncol-e230634-s002.pdf [file jamaoncol-e230634-s002.pdf]

## Data Sharing Statement

Bevel. Association of Food Deserts and Food Swamps With Obesity-Related Cancer Mortality in the US. *JAMA Oncol.* Published May 04, 2023. doi:10.1001/jamaoncol.2023.0634

### Data

**Data available:** No

### Additional Information

**Explanation for why data not available:** The data comes from publicly available sources (CDC and the USDA).
